# Supplementary material for: Comparative Analysis of Human Mesenchymal Stem Cells from Bone Marrow, Adipose Tissue, and Umbilical Cord Blood as Sources of Cell Therapy
Source: Int J Mol Sci. 2013 Sep 3;14(9):17986–8001. doi: 10.3390/ijms140917986 (PMC3794764; doi:10.3390/ijms140917986)

## Supplementary Information

**Figure S1.** Inhibition of Ang-1 secretion by siRNA in UCB-MSCs. Reduced secretion of Ang-1 was measured by ELISA. Error bars represent the means  $\pm$  SD,  $n = 3$ ; \*\*  $p < 0.01$  vs. control siRNA.

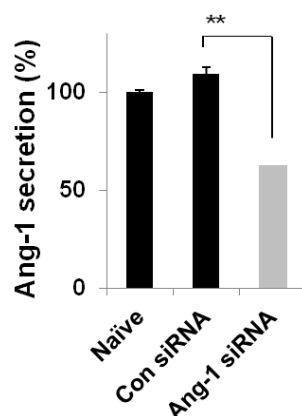

### Migration Assays via a Transwell System

MSCs from three sources (BM, AT, UCB) were labeled with PKH26 (Sigma). Labeling was performed according to recommended protocol. In brief, cells were suspended in Diluent C at a density of  $2 \times 10^6$  cells/mL and mixed with an equal volume of the PKH26 dye in Diluent C. Labeling was carried out at room temperature for 4 min. The labeling reaction was terminated by the addition of an equal volume of FBS. For inflammatory condition *in vitro*, we used LPS-exposed NR8383, as described in Expression section. MSCs migration was analyzed using transwell migration assays (FALCON). This permitted separation of the two plate chambers with a porous membrane (8.0  $\mu$ m size) was cultured. PKH26-labeled MSCs ( $1 \times 10^4$  in 500  $\mu$ L medium) were added to the upper chamber with NR8383 or LPS-exposed NR8383 (lower chamber). The chambers were incubated at 37  $^{\circ}$ C for 72 h. Then, the numbers of MSCs that had migrated into the lower chamber were counted.

**Figure S2.** Migration assay of MSCs from BM, AT, and UCB. (a) Analysis of ELISA revealed up-regulation of inflammatory cytokines IL-1 $\alpha$ , IL-6, and IL-8 in NR8383 after LPS stimulation. Error bars represent the means  $\pm$  SD,  $n = 3$ ; \*\*  $p < 0.01$  vs. NR8383; and (b) MSCs from three sources and LPS exposed NR8383 were co-cultured in the upper and lower chambers respectively. After 72 h, migrated MSCs in a lower chamber were counted under the microscope.

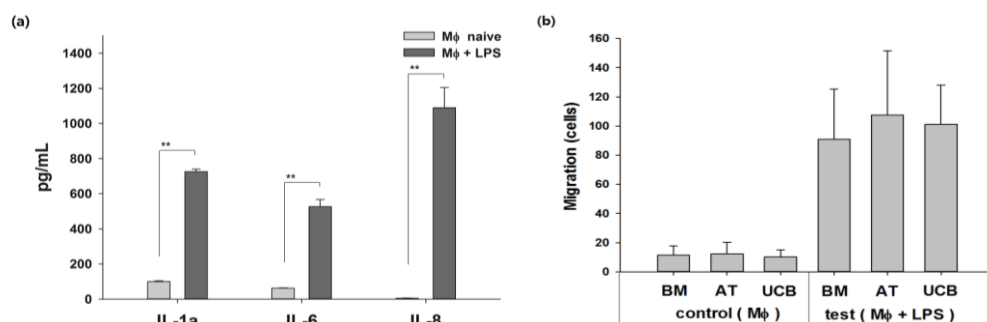

### Mixed Lymphocyte Reaction Assay (MLR)

To assess T-cell reactivity against allogeneic cell populations, human responder peripheral blood mononuclear cells (PBMCs) were co-cultured with inactivated allogeneic PBMCs or BM-, AT-, or UCB-MSCs in 96-well plates. PBMCs were purchased from Astarte Biologics, LLC (Bellevue, WA, USA). The stimulator PBMCs and other MSCs were inactivated by treatment with 10  $\mu$ g/mL mitomycin-C (Sigma) for 1 h at 37  $^{\circ}$ C. To assess suppression of T-cell proliferation, clustering of T-cells was assessed in bright field and BrdU ELISA (Roche, Mannheim, Germany) at 3 days' cultivation. Sample absorbance was measured at 370–492 nm.

**Figure S3.** Immunosuppression by MSCs from BM, AT, and UCB. Human responder PBMCs were cultured with inactivated allogeneic PBMCs (positive control; MLR). All MSCs significantly reduced the proliferation of alloreactive T-lymphocytes in comparison to MLR. The difference between MSCs was not statistically significant. Error bars represent the means  $\pm$  SD,  $n = 5$ ; \*\*  $p < 0.01$  vs. MLR.

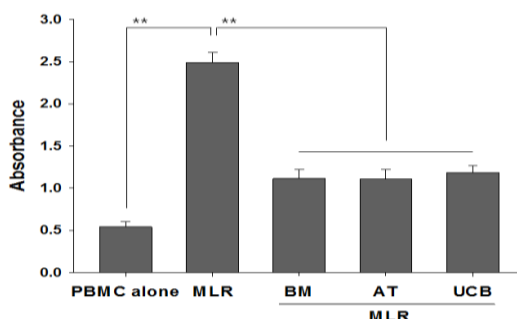

Supplement: Supplementary file 1 [file ijms-14-17986-s001.pdf]
